# Supplementary material
Source: publisher site journal article supplement (https://www.degruyter.com/publication/journal_key/GEO/downloadAsset/GEO_Journal%20Partners.pdf)
Supplement: Supplementary file 1 [file GEO_Journal%20Partners.pdf]

## JOURNAL PARTNERS

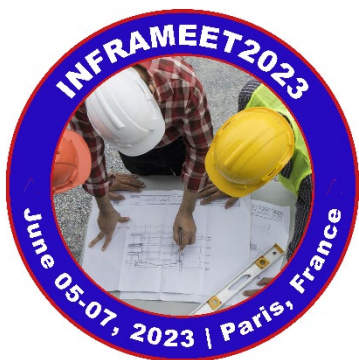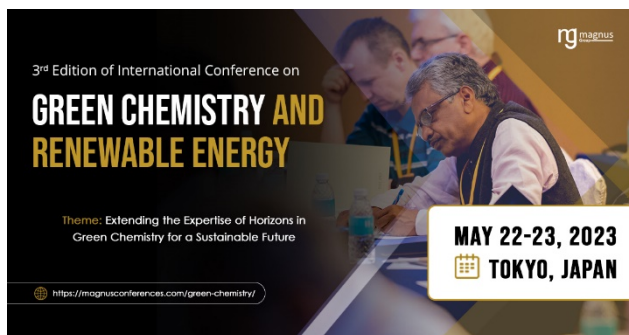

2<sup>nd</sup> Global Summit on Environmental Science and Applications

# EnScience2023

May 25-27, 2023 | Brussels, Belgium

<https://www.thescientistt.com/2023/environmental-science-applications>
